# Supplementary material for: Co-expression Network Analysis of Biomarkers for Adrenocortical Carcinoma
Source: Front Genet. 2018 Aug 15;9:328. doi: 10.3389/fgene.2018.00328 (PMC6104177; doi:10.3389/fgene.2018.00328)
Supplement: Supplementary file 3 [file Table_3.xlsx]

## Sheet: Sheet3
Supplementary Table S3. Pearson's Correlation analysis and ANOVA analysis of candidate hub genes.
	TCGA ACC				GSE19750
Gene	Pearson's correlation		One-way ANOVA		Pearson's correlation		One-way ANOVA
	Correlation	P.Value	F	P.Value	Correlation	P.Value	F	P.Value
MKI67	0.50535	2.76566e-06	10.4872	8.12192e-06	0.254715	0.190848	1.2526	0.312843
ANLN	0.375855	0.000755539	5.05693	0.00307893	0.512313	0.00531627	3.64844	0.0267911
ASPM	0.38462	0.000552953	5.16072	0.00272701	0.596932	0.000798522	5.57322	0.00477704
CCNA2	0.325304	0.00389185	3.33947	0.0238555	0.459117	0.0139863	2.2898	0.103982
CCNB2	0.429878	9.55038e-05	7.09409	0.000300657	0.720167	1.55427e-05	9.1074	0.000332084
CDC20	0.373901	0.00080906	4.96736	0.00341974	0.655032	0.000155194	8.06147	0.000690196
CDCA2	0.327306	0.0036654	3.74862	0.01456	0.507227	0.00587015	3.39596	0.0341652
CDCA5	0.394982	0.000378013	5.22897	0.00251823	0.573631	0.00141609	5.01014	0.00773332
CDK1	0.488413	6.59658e-06	8.84866	4.46238e-05	0.449358	0.0164443	2.45586	0.0875609
CENPF	0.431896	8.77857e-05	6.9782	0.000342098	0.544941	0.00271221	3.94205	0.0202964
CEP55	0.442899	5.49332e-05	6.57317	0.000538862	0.66039	0.00013113	6.94432	0.00158613
DEPDC1	0.401426	0.00029651	6.25515	0.000772437	0.558718	0.00199956	4.44877	0.0127311
DLGAP5	0.407614	0.000233735	6.32368	0.000714595	0.620422	0.000428092	6.75331	0.00183908
FOXM1	0.483272	8.51083e-06	8.36482	7.4855e-05	0.475554	0.0105376	3.19332	0.041651
HJURP	0.38611	0.000523939	4.86663	0.00384926	0.690508	4.76523e-05	8.97358	0.000363803
KIAA0101	0.367088	0.00102363	4.39598	0.00671418	0.594443	0.000850694	4.52122	0.0119252
KIF18A	0.423825	0.000122569	6.14269	0.000877959	0.569484	0.00156123	5.47532	0.00518777
MELK	0.506911	2.54678e-06	11.5584	2.77191e-06	0.663508	0.000118699	8.80149	0.000409493
NCAPH	0.379614	0.000661583	4.87773	0.00379931	0.492508	0.00775633	3.12786	0.0444286
NDC80	0.388998	0.000471591	4.66797	0.00486472	0.606172	0.000628489	4.9312	0.00828561
PRC1	0.417225	0.000160041	5.98893	0.00104655	0.579086	0.00124308	4.92016	0.00836616
RACGAP1	0.407716	0.000232808	5.98003	0.00105726	0.495202	0.00737736	3.19017	0.0417802
RRM2	0.326222	0.00378652	4.66351	0.00489041	0.401755	0.0340753	2.20343	0.113777
SPAG5	0.443658	5.31537e-05	6.30814	0.000727307	0.60469	0.000653423	6.55568	0.00214731
TPX2	0.336399	0.00277787	3.99511	0.0108312	0.594946	0.000839908	5.61184	0.0046248
ATAD2	0.368199	0.000985448	5.39474	0.0020764	-0.160037	0.415937	1.2382	0.317714
AURKB	0.359493	0.00132269	3.89869	0.0121581	0.649675	0.000183082	7.54602	0.00100628
BIRC5	0.360159	0.0012936	4.23808	0.00810218	0.0801426	0.685188	1.00785	0.406435
BUB1	0.405222	0.00025639	5.01886	0.00321932	-0.0363328	0.854367	0.604505	0.618456
CDC45	0.505168	2.79228e-06	10.6706	6.74214e-06	0.574814	0.00137692	4.71743	0.0100055
CDCA8	0.394814	0.000380397	4.81909	0.0040707	0.671467	9.15738e-05	9.44017	0.00026545
CENPA	0.433094	8.34826e-05	7.09234	0.000301243	0.516909	0.00485451	3.10538	0.0454274
DTL	0.43865	6.59598e-05	6.49934	0.000585693	0.680536	6.74873e-05	7.43725	0.00109123
ECT2	0.49317	5.19167e-06	11.308	3.55433e-06	-0.308483	0.110233	2.2108	0.112904
ERCC6L	0.509355	2.23631e-06	10.7699	6.09797e-06	0.511602	0.00539088	3.49203	0.0311314
EXO1	0.399397	0.00032024	5.69249	0.00147117	0.641299	0.000235585	6.35793	0.00251224
HELLS	0.400712	0.000304673	4.9082	0.00366569	0.148884	0.449572	0.851988	0.479257
KIF2C	0.354963	0.00153664	4.44919	0.00630312	0.679858	6.90706e-05	9.71651	0.000221073
KIF11	0.472283	1.44756e-05	8.13455	9.59739e-05	0.337504	0.0790142	1.39324	0.269012
KIF14	0.450335	3.965e-05	8.01239	0.000109567	0.686441	5.50076e-05	9.13093	0.000326823
KIF15	0.348465	0.00189819	3.86574	0.0126486	0.621597	0.000414413	6.41444	0.00240157
MCM3	0.322198	0.00426774	3.75614	0.0144289	0.643079	0.000223431	8.20425	0.000622986
MCM5	0.412414	0.00019373	6.45438	0.000616232	0.623	0.000398567	6.12421	0.00303201
NCAPG	0.486911	7.10931e-06	8.82004	4.60023e-05	0.130374	0.50845	1.0959	0.370011
NEK2	0.445101	4.99163e-05	7.75136	0.000145618	0.24	0.218646	1.10544	0.366259
NUF2	0.427122	0.000107056	6.04189	0.000985034	0.697454	3.70922e-05	9.97009	0.000187351
PBK	0.267327	0.018755	2.15692	0.100422	0.603436	0.000675184	5.41137	0.0054765
PLK4	0.390719	0.000442706	4.4449	0.00633527	0.249221	0.200925	1.48431	0.243968
POLQ	0.50058	3.54944e-06	8.45647	6.78338e-05	0.541666	0.00291055	4.61869	0.0109264
RAD51AP1	0.368112	0.000988383	4.27301	0.00777184	0.595513	0.000827919	5.04979	0.007471
RAD51C	0.181318	0.114533	1.04417	0.378259	-0.0377856	0.848608	1.07511	0.37832
RAD54L	0.363547	0.00115444	3.95171	0.0114092	0.428463	0.0229169	2.11214	0.125188
SKA1	0.160136	0.164164	1.16971	0.327219	0.417307	0.0271456	2.69362	0.0686537
SPC25	0.417542	0.000158022	5.79689	0.00130451	0.240714	0.217237	0.838017	0.486332
TOP2A	0.359529	0.00132112	4.52613	0.00575346	0.289145	0.13561	2.04624	0.134166
TRIP13	0.429882	9.54872e-05	5.81035	0.00128447	0.748999	4.53326e-06	13.4287	2.39078e-05
TYMS	0.286861	0.0114251	2.79525	0.0461845	0.460266	0.0137182	3.5516	0.0293956
UBE2C	0.308166	0.00639872	2.93362	0.0390318	0.727117	1.17117e-05	9.10272	0.000333141
UBE2T	0.341405	0.00237621	4.61096	0.00520378	0.610587	0.000559094	5.082	0.00726499
ZWINT	0.441539	5.82613e-05	6.97783	0.000342238	0.613169	0.000521685	5.55049	0.00486919
